# Supplementary material
Source: PubMed Central journal article supplement (PMC4165557)
Supplement: NIHMS622403-supplement-10549_2014_3092_MOESM4_ESM.pdf [file NIHMS622403-supplement-10549_2014_3092_MOESM4_ESM.pdf]

Neuromarkers of Fatigue and Cognitive Complaints Following Chemotherapy for Breast Cancer: A Prospective fMRI Investigation

Mary K. Askren<sup>1</sup>

Mi Sook Jung<sup>2,3</sup>

Marc G. Berman<sup>4</sup>

Min Zhang<sup>2</sup>

Barbara Therrien<sup>2</sup>

Scott Peltier<sup>2</sup>

Lynn Ossher<sup>2</sup>

Daniel F. Hayes<sup>2</sup>

Patricia A. Reuter-Lorenz<sup>2</sup>

Bernadine Cimprich<sup>2</sup>

<sup>1</sup>Integrated Brain Imaging Center, Department of Radiology, University of Washington; <sup>2</sup>University of Michigan; <sup>3</sup>Chungam National University; <sup>4</sup>Department of Psychology, University of Chicago

Address correspondence to:

Mary K. Askren, Ph.D.  
Integrated Brain Imaging Center  
University of Washington  
Email: askren@uw.edu  
Phone: 206-221-9138  
Fax: 206-543-3495

Table S1. VWMT Performance and fMRI and Self-reported Attentional Function, Fatigue, and Worry

|                          | Chemotherapy group<br>(n = 28)               |                                               | Non-chemotherapy group<br>(n = 37)     |                                             | Control group<br>(n = 32)                           |                                                     |
|--------------------------|----------------------------------------------|-----------------------------------------------|----------------------------------------|---------------------------------------------|-----------------------------------------------------|-----------------------------------------------------|
|                          | Pre-treatment                                | Post-treatment                                | Pre-treatment                          | Post-treatment                              | Pre-treatment                                       | Post-treatment                                      |
|                          | M ± SD<br>(Range)                            | M ± SD<br>(Range)                             | M ± SD<br>(Range)                      | M ± SD<br>(Range)                           | M ± SD<br>(Range)                                   | M ± SD<br>(Range)                                   |
| <b>Error rate</b>        |                                              |                                               |                                        |                                             |                                                     |                                                     |
| Unfamiliar               | 0.04 ± 0.07<br>(0.00 – 0.33)                 | 0.04 ± 0.06<br>(0.00 – 0.22)                  | 0.02 ± 0.04<br>(0.00 – 0.17)           | 0.02 ± 0.04<br>(0.00 – 0.17)                | 0.02 ± 0.04<br>(0.00 – 0.21)                        | 0.03 ± 0.04<br>(0.00 – 0.13)                        |
| Familiar                 | 0.09 ± 0.08<br>(0.00 – 0.29)                 | 0.09 ± 0.07<br>(0.00 – 0.27)                  | 0.08 ± 0.08<br>(0.00 – 0.31)           | 0.07 ± 0.07<br>(0.00 – 0.27)                | 0.06 ± 0.05<br>(0.00 – 0.15)                        | 0.06 ± 0.06<br>(0.00 – 0.23)                        |
| Overall                  | 0.07 ± 0.07<br>(0.00 – 0.25)                 | 0.08 ± 0.06<br>(0.00 – 0.24)                  | 0.06 ± 0.06<br>(0.00 – 0.24)           | 0.05 ± 0.06<br>(0.00 – 0.22)                | 0.04 ± 0.04<br>(0.00 – 0.17)                        | 0.05 ± 0.04<br>(0.00 – 0.19)                        |
| <b>Reaction time</b>     |                                              |                                               |                                        |                                             |                                                     |                                                     |
| Unfamiliar               | 1073.16 ± 200.83<br>(767.75 – 1572.63)       | 1054.89 ± 194.17<br>(722.26 – 1598.82)        | 1086.89 ± 164.66<br>(770.67 – 1517.80) | 1050.08 ± 151.58<br>(799.96 – 1409.00)      | 1056.40 ± 170.45 <sup>b</sup><br>(758.88 – 1467.38) | 1005.52 ± 194.35 <sup>b</sup><br>(729.38 – 1507.96) |
| Familiar                 | 1178.20 ± 180.45<br>(867.17 – 1648.00)       | 1172.89 ± 190.46<br>(868.80 – 1703.69)        | 1204.44 ± 176.63<br>(855.52 – 1724.71) | 1181.16 ± 158.19<br>(930.74 – 1626.09)      | 1177.99 ± 208.42 <sup>b</sup><br>(749.41 – 1761.94) | 1128.68 ± 231.90 <sup>b</sup><br>(763.19 – 1736.71) |
| Overall                  | 1143.19 ± 183.32<br>(834.03 – 1622.88)       | 1133.56 ± 187.95<br>(832.08 – 1668.73)        | 1165.26 ± 169.49<br>(827.24 – 1655.74) | 1137.46 ± 151.81<br>(896.68 – 1553.73)      | 1137.46 ± 192.84 <sup>b</sup><br>(752.56 – 1663.75) | 1087.62 ± 217.79 <sup>b</sup><br>(751.92 – 1660.46) |
| <b>Executive Network</b> |                                              |                                               |                                        |                                             |                                                     |                                                     |
| Mean                     | 4.22 ± 3.18<br>(-3.66 – 12.91)               | 4.72 ± 3.22<br>(-0.85 – 12.09)                | 3.64 ± 2.97<br>(-1.58 – 10.93)         | 4.91 ± 3.07<br>(-0.32 – 16.78)              | 4.04 ± 4.27<br>(-3.72 – 15.69)                      | 5.09 ± 2.99<br>(-0.76 – 13.45)                      |
| Variance                 | 39.57 ± 20.68<br>(10.62 – 120.41)            | 34.52 ± 20.60<br>(2.83 – 77.82)               | 30.75 ± 14.34<br>(9.33 – 71.58)        | 31.42 ± 14.91<br>(8.11 – 77.07)             | 36.76 ± 32.25<br>(0.61 – 188.81)                    | 33.59 ± 14.18<br>(3.76 – 72.91)                     |
| AFI                      | 7.30 ± 1.61 <sup>b</sup><br>(3.88 – 9.63)    | 6.59 ± 1.62 <sup>b</sup><br>(3.31 – 9.88)     | 7.35 ± 1.78<br>(2.50 – 9.88)           | 7.21 ± 1.92<br>(3.38 – 9.88)                | 7.52 ± 1.48<br>(4.81 – 9.81)                        | 7.07 ± 1.74<br>(2.63 – 9.75)                        |
| Fatigue                  | 13.39 ± 10.87 <sup>b</sup><br>(0.00 – 37.00) | 17.89 ± 8.56 <sup>a,b</sup><br>(2.00 – 37.00) | 9.56 ± 7.72<br>(1.00 – 36.00)          | 10.43 ± 8.44 <sup>a</sup><br>(1.00 – 30.00) | 8.09 ± 7.82<br>(0.00 – 30.00)                       | 10.84 ± 11.08 <sup>a</sup><br>(0.00 – 40.00)        |
| Worry                    | 2.57 ± 0.82<br>(1.00 – 4.00)                 | 2.73 ± 1.23<br>(1.00 – 5.00)                  | 2.19 ± 0.84<br>(1.00 – 4.00)           | 2.15 ± 0.88<br>(1.00 – 4.00)                | 2.29 ± 0.86<br>(1.00 – 5.00)                        | 2.25 ± 0.83<br>(1.00 – 4.00)                        |

Abbreviation: AFI = Attentional Function Index.

<sup>a</sup>p < .05 for One-Way ANOVA across groups. <sup>b</sup>p < .05 for paired t-test between pre-treatment and post-treatment assessments.

One non-chemotherapy participant was missing fatigue, AFI, and worry self-reports at the pre-assessment timepoint. One chemotherapy participant was missing worry self-report data at the pre-assessment timepoint. One chemotherapy participant was missing fatigue, AFI, and worry self-reports at the post-assessment timepoint.
