# Supplementary material
Source: PubMed Central journal article supplement (PMC4165557)
Supplement: NIHMS622403-supplement-10549_2014_3092_MOESM5_ESM.pdf [file NIHMS622403-supplement-10549_2014_3092_MOESM5_ESM.pdf]

Neuromarkers of Fatigue and Cognitive Complaints Following Chemotherapy for Breast Cancer: A Prospective fMRI Investigation

Mary K. Askren<sup>1</sup>

Mi Sook Jung<sup>2,3</sup>

Marc G. Berman<sup>4</sup>

Min Zhang<sup>2</sup>

Barbara Therrien<sup>2</sup>

Scott Peltier<sup>2</sup>

Lynn Ossher<sup>2</sup>

Daniel F. Hayes<sup>2</sup>

Patricia A. Reuter-Lorenz<sup>2</sup>

Bernadine Cimprich<sup>2</sup>

<sup>1</sup>Integrated Brain Imaging Center, Department of Radiology, University of Washington; <sup>2</sup>University of Michigan; <sup>3</sup>Chungam National University; <sup>4</sup>Department of Psychology, University of Chicago

Address correspondence to:

Mary K. Askren, Ph.D.  
Integrated Brain Imaging Center  
University of Washington  
Email: askren@uw.edu  
Phone: 206-221-9138  
Fax: 206-543-3495

Table S2. Activation in Subregions of the Executive Network and Unrelated Networks by Group

|                                   | Chemotherapy group<br>(n = 28)                 |                                               | Non-chemotherapy group<br>(n = 37)          |                                             | Control group<br>(n = 32)        |                                 |
|-----------------------------------|------------------------------------------------|-----------------------------------------------|---------------------------------------------|---------------------------------------------|----------------------------------|---------------------------------|
|                                   | Pre-treatment                                  | Post-treatment                                | Pre-treatment                               | Post-treatment                              | Pre-treatment                    | Post-treatment                  |
|                                   | M ± SD<br>(Range)                              | M ± SD<br>(Range)                             | M ± SD<br>(Range)                           | M ± SD<br>(Range)                           | M ± SD<br>(Range)                | M ± SD<br>(Range)               |
| <b>Anterior Cingulate Cluster</b> |                                                |                                               |                                             |                                             |                                  |                                 |
| Mean                              | 5.98 ± 5.37<br>(-4.45 – 19.94)                 | 6.77 ± 4.72<br>(-1.24 – 18.20)                | 4.78 ± 5.58 <sup>b</sup><br>(-8.99 – 15.21) | 7.13 ± 4.90 <sup>b</sup><br>(-1.58 – 21.68) | 5.49 ± 6.29<br>(-8.09 – 22.87)   | 6.96 ± 3.65<br>(-1.42 – 17.27)  |
| Spatial Variance                  | 25.57 ± 17.14<br>(6.60 – 92.64)                | 31.05 ± 24.66<br>(2.06 – 105.94)              | 22.56 ± 17.95<br>(2.96 – 103.07)            | 24.26 ± 17.96<br>(7.98 – 105.02)            | 26.85 ± 24.56<br>(0.50 – 129.20) | 26.54 ± 17.09<br>(2.73 – 85.44) |
| <b>Left Frontal Cluster</b>       |                                                |                                               |                                             |                                             |                                  |                                 |
| Mean                              | 4.61 ± 3.42<br>(-3.42 – 12.75)                 | 4.92 ± 3.51<br>(-2.97 – 11.05)                | 3.87 ± 2.66 <sup>b</sup><br>(-1.31 – 9.74)  | 4.93 ± 2.90 <sup>b</sup><br>(-0.06 – 15.57) | 4.12 ± 4.05<br>(-3.60 – 12.98)   | 5.12 ± 3.09<br>(-0.96 – 11.15)  |
| Spatial Variance                  | 45.75 ± 24.00<br>(13.50 – 136.64)              | 36.55 ± 24.18<br>(3.08 – 112.08)              | 35.50 ± 18.12<br>(8.48 – 78.26)             | 36.89 ± 18.72<br>(9.50 – 95.01)             | 42.19 ± 44.39<br>(0.70 – 264.07) | 36.28 ± 17.79<br>(2.99 – 94.99) |
| <b>Right Frontal Cluster</b>      |                                                |                                               |                                             |                                             |                                  |                                 |
| Mean                              | 3.40 ± 2.88<br>(-3.11 – 9.54)                  | 3.47 ± 3.49<br>(-2.66 – 11.07)                | 3.11 ± 2.91<br>(-2.97 – 11.42)              | 3.65 ± 3.14<br>(-0.51 – 16.76)              | 2.92 ± 4.02<br>(-5.72 – 13.61)   | 3.78 ± 3.68<br>(-2.90 – 15.41)  |
| Spatial Variance                  | 22.18 ± 13.85<br>(2.86 – 58.45)                | 19.76 ± 12.09<br>(1.70 – 43.30)               | 15.95 ± 10.42<br>(4.09 – 45.27)             | 14.91 ± 8.45<br>(4.78 – 44.18)              | 18.28 ± 13.92<br>(0.52 – 51.06)  | 20.09 ± 13.67<br>(1.47 – 63.72) |
| <b>Left Parietal Cluster</b>      |                                                |                                               |                                             |                                             |                                  |                                 |
| Mean                              | 1.88 ± 3.91<br>(-5.32 – 13.32)                 | 3.37 ± 3.35<br>(-1.47 – 9.98)                 | 2.34 ± 3.43 <sup>b</sup><br>(-5.61 – 9.94)  | 3.86 ± 3.55 <sup>b</sup><br>(-5.87 – 13.77) | 3.55 ± 6.41<br>(-4.82 – 20.77)   | 4.71 ± 4.81<br>(-4.14 – 15.86)  |
| Spatial Variance                  | 21.81 ± 20.29<br>(3.65 – 101.20)               | 18.68 ± 14.19<br>(0.82 – 57.60)               | 18.68 ± 16.39<br>(1.15 – 82.09)             | 17.36 ± 14.78<br>(1.57 – 70.64)             | 22.42 ± 22.68<br>(0.44 – 107.25) | 23.85 ± 15.50<br>(2.19 – 65.85) |
| <b>Right Parietal Cluster</b>     |                                                |                                               |                                             |                                             |                                  |                                 |
| Mean                              | 1.26 ± 3.22<br>(-5.81 – 8.47)                  | 2.60 ± 3.85<br>(-6.03 – 9.02)                 | 1.48 ± 3.89 <sup>b</sup><br>(-4.89 – 10.82) | 3.50 ± 3.99 <sup>b</sup><br>(-3.86 – 16.84) | 3.37 ± 4.47<br>(-3.96 – 16.14)   | 4.01 ± 3.86<br>(-3.93 – 11.07)  |
| Spatial Variance                  | 11.33 ± 8.95<br>(0.86 – 36.53)                 | 10.30 ± 8.71<br>(0.42 – 31.21)                | 8.39 ± 6.24<br>(0.89 – 26.64)               | 10.16 ± 7.60<br>(0.79 – 31.62)              | 12.15 ± 11.19<br>(0.50 – 50.70)  | 11.15 ± 8.78<br>(0.20 – 35.30)  |
| <b>Default Network</b>            |                                                |                                               |                                             |                                             |                                  |                                 |
| Mean                              | -2.42 ± 3.22 <sup>b</sup><br>(-6.45 – 3.96)    | -1.13 ± 3.06 <sup>b</sup><br>(-7.69 – 4.85)   | -2.95 ± 2.68 <sup>b</sup><br>(-7.97 – 2.59) | -1.44 ± 3.46 <sup>b</sup><br>(-7.95 – 8.00) | -1.19 ± 3.74<br>(-10.11 – 8.93)  | -1.40 ± 3.57<br>(-8.62 – 5.04)  |
| Spatial Variance                  | 16.65 ± 12.41<br>(4.61 – 49.47)                | 14.30 ± 10.67<br>(4.22 – 48.49)               | 15.74 ± 12.99<br>(4.50 – 79.11)             | 13.66 ± 10.31<br>(3.83 – 53.37)             | 15.60 ± 13.68<br>(1.02 – 69.36)  | 15.20 ± 9.13<br>(1.59 – 43.41)  |
| <b>Null Network</b>               |                                                |                                               |                                             |                                             |                                  |                                 |
| Mean                              | 1.45 ± 1.71<br>(-1.49 – 5.16)                  | 1.66 ± 1.81<br>(-2.15 – 5.91)                 | 1.25 ± 1.91 <sup>b</sup><br>(-1.97 – 6.15)  | 2.10 ± 2.33 <sup>b</sup><br>(-1.66 – 10.03) | 1.58 ± 2.25<br>(-3.61 – 6.97)    | 1.92 ± 2.13<br>(-1.64 – 6.91)   |
| Spatial Variance                  | 35.70 ± 25.32 <sup>b</sup><br>(16.00 – 149.21) | 29.28 ± 21.93 <sup>b</sup><br>(2.73 – 118.53) | 26.52 ± 12.61<br>(12.66 – 78.54)            | 32.26 ± 29.02<br>(8.64 – 176.08)            | 31.43 ± 25.32<br>(0.72 – 132.14) | 30.13 ± 12.08<br>(3.26 – 67.62) |

<sup>a</sup>There were no significant differences for One-Way ANOVAs across all 3 groups. <sup>b</sup>p < .05 for paired t-test between pre-treatment and post-treatment assessments.
